# Supplementary material for: High-contrast multi-surface imaging of latent fingerprints using color-tunable YOF:Tb3+,Eu3+ ultrafine nanophosphors with high quantum yield
Source: Royal Society of Chemistry journal article supplement (doi:10.1039/d4dt01187b), 2024-01-01
Supplement: d4dt01187b1.pdf [file d4dt01187b1.pdf]

# High-contrast multi-surface imaging of latent fingerprints using color-tunable YOF:Tb<sup>3+</sup>, Eu<sup>3+</sup> ultrafine nanophosphors with high quantum yield

*Sumedha Tamboli, Govind B. Nair\*, Robin E. Kroon, Lucas J. B. Erasmus, Hendrik C. Swart#*

Department of Physics, University of the Free State, P. O. Box 339, Bloemfontein 9300, South Africa.

\*Corresponding author Email: [govind1291@yahoo.com](mailto:govind1291@yahoo.com) ; [Nair.GB@ufs.ac.za](mailto:Nair.GB@ufs.ac.za)

#Corresponding author Email: [swarthc@ufs.ac.za](mailto:swarthc@ufs.ac.za)

## Supporting Information

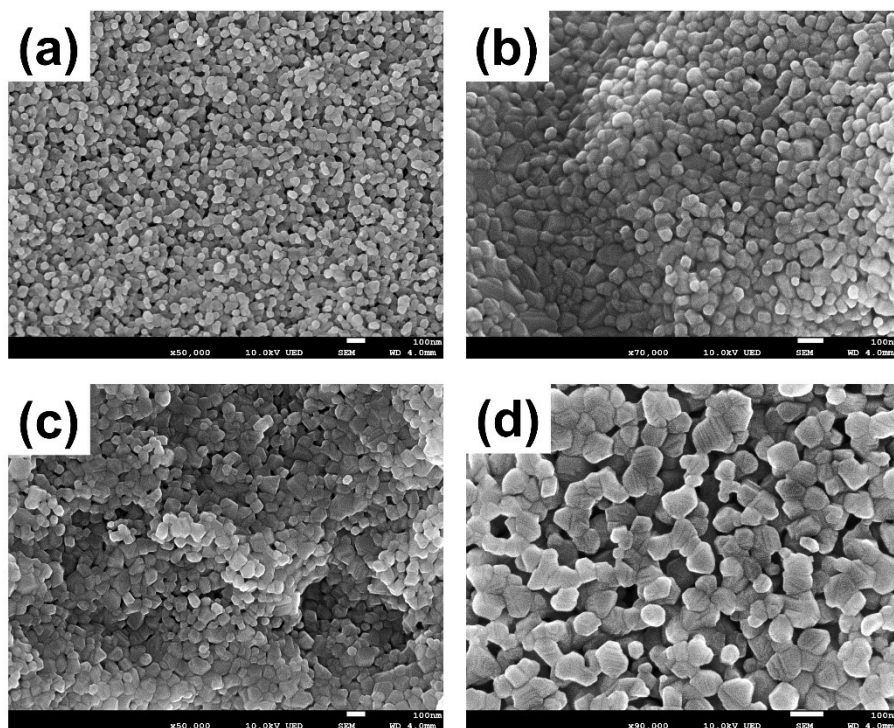

**Figure S1** FE-SEM images of: (a) YOF: 0.01 Tb<sup>3+</sup>, (b) YOF: 0.01 Eu<sup>3+</sup>, (c) YOF: 0.01 Tb<sup>3+</sup>, 0.005 Eu<sup>3+</sup>, (d) YOF: 0.005 Tb<sup>3+</sup>, 0.01 Eu<sup>3+</sup> nanophosphors.

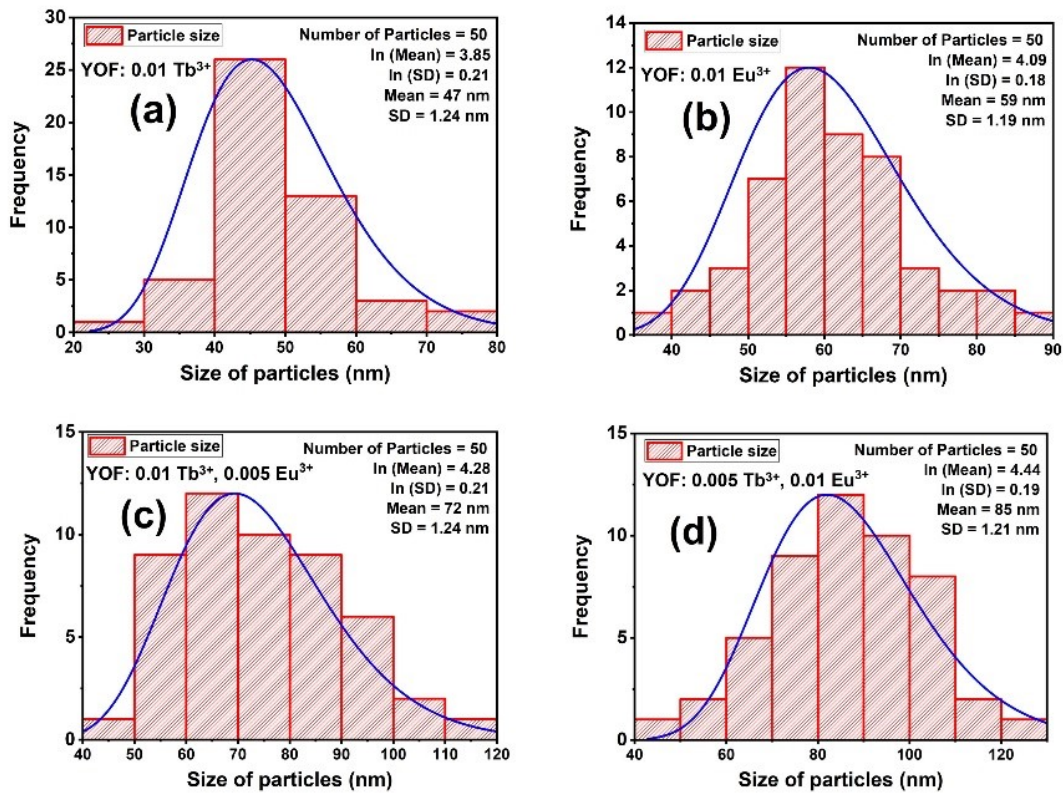

**Figure S2** Histograms showing the particle-size distribution of: (a) YOF: 0.01 Tb<sup>3+</sup>, (b) YOF: 0.01 Eu<sup>3+</sup>, (c) YOF: 0.01 Tb<sup>3+</sup>, 0.005 Eu<sup>3+</sup>, (d) YOF: 0.005 Tb<sup>3+</sup>, 0.01 Eu<sup>3+</sup> nanophosphors.

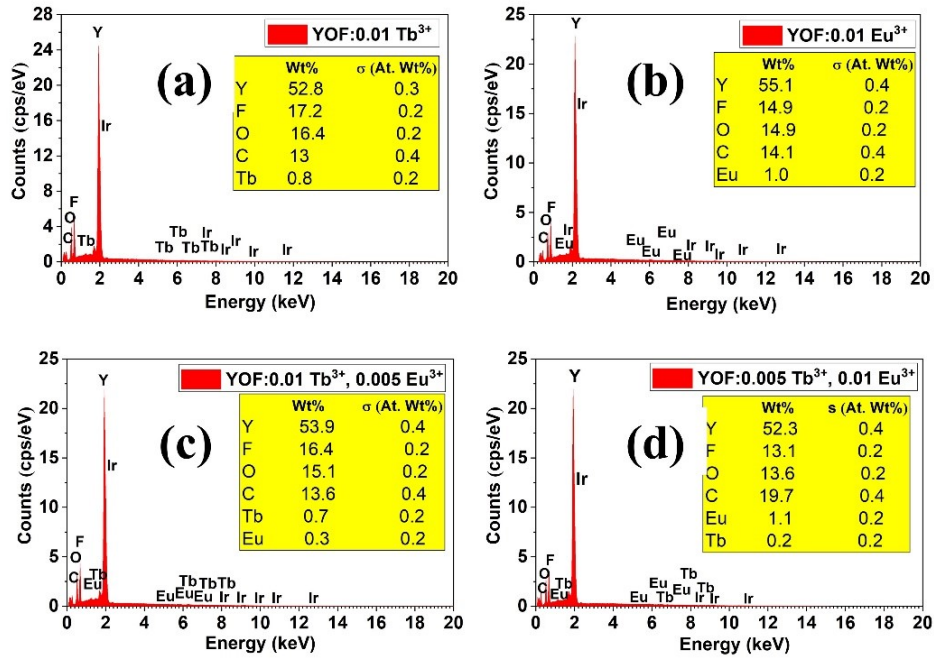

**Figure S3** EDS of: (a) YOF: 0.01 Tb<sup>3+</sup>, (b) YOF: 0.01 Eu<sup>3+</sup>, (c) YOF: 0.01 Tb<sup>3+</sup>, 0.005 Eu<sup>3+</sup>, (d) YOF: 0.005 Tb<sup>3+</sup>, 0.01 Eu<sup>3+</sup> nanophosphors.

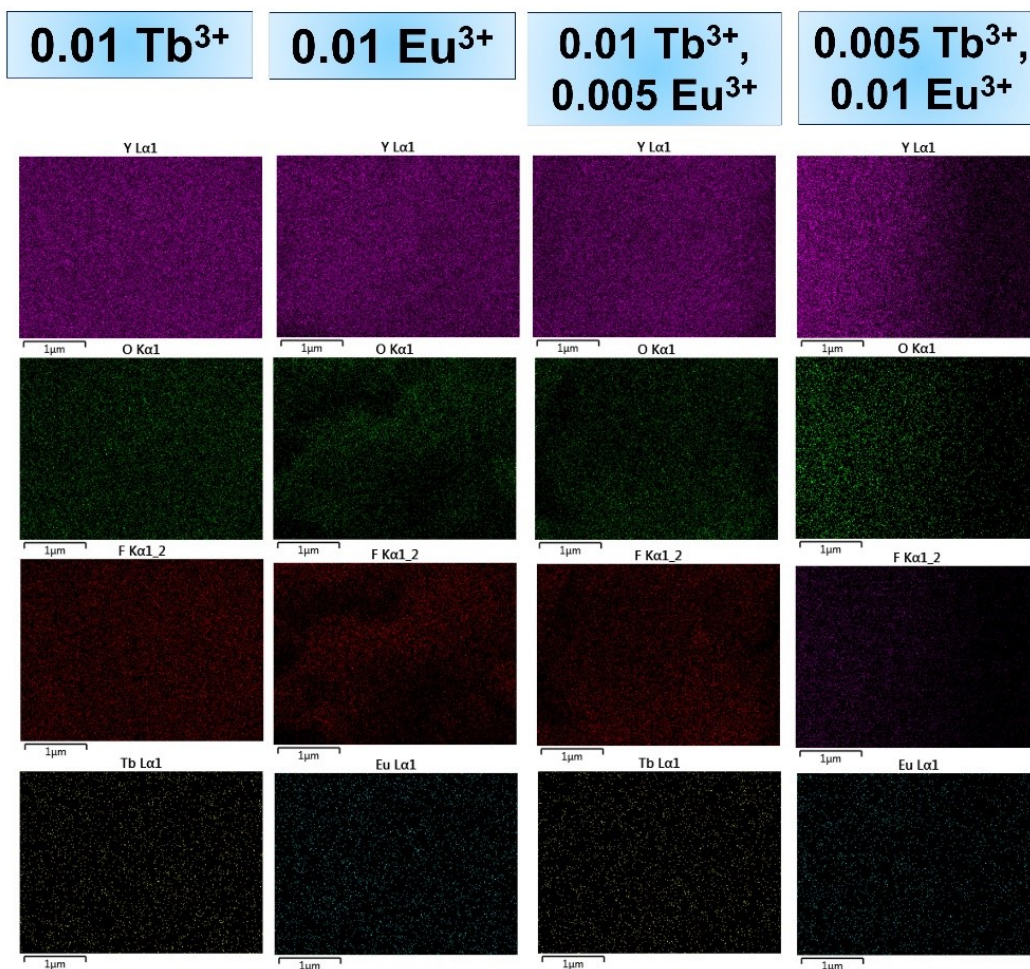

**Figure S4** Elemental mapping of: (a) YOF: 0.01 Tb<sup>3+</sup>, (b) YOF: 0.01 Eu<sup>3+</sup>, (c) YOF: 0.01 Tb<sup>3+</sup>, 0.005 Eu<sup>3+</sup>, (d) YOF: 0.005 Tb<sup>3+</sup>, 0.01 Eu<sup>3+</sup> nanophosphors.

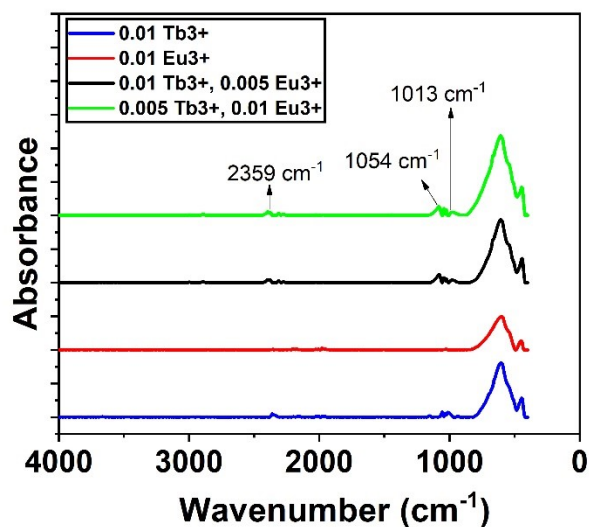

**Figure S5** FTIR spectra for: (a) YOF: 0.01 Tb<sup>3+</sup>, (b) YOF: 0.01 Eu<sup>3+</sup>, (c) YOF: 0.01 Tb<sup>3+</sup>, 0.005 Eu<sup>3+</sup>, (d) YOF: 0.005 Tb<sup>3+</sup>, 0.01 Eu<sup>3+</sup> nanophosphors.

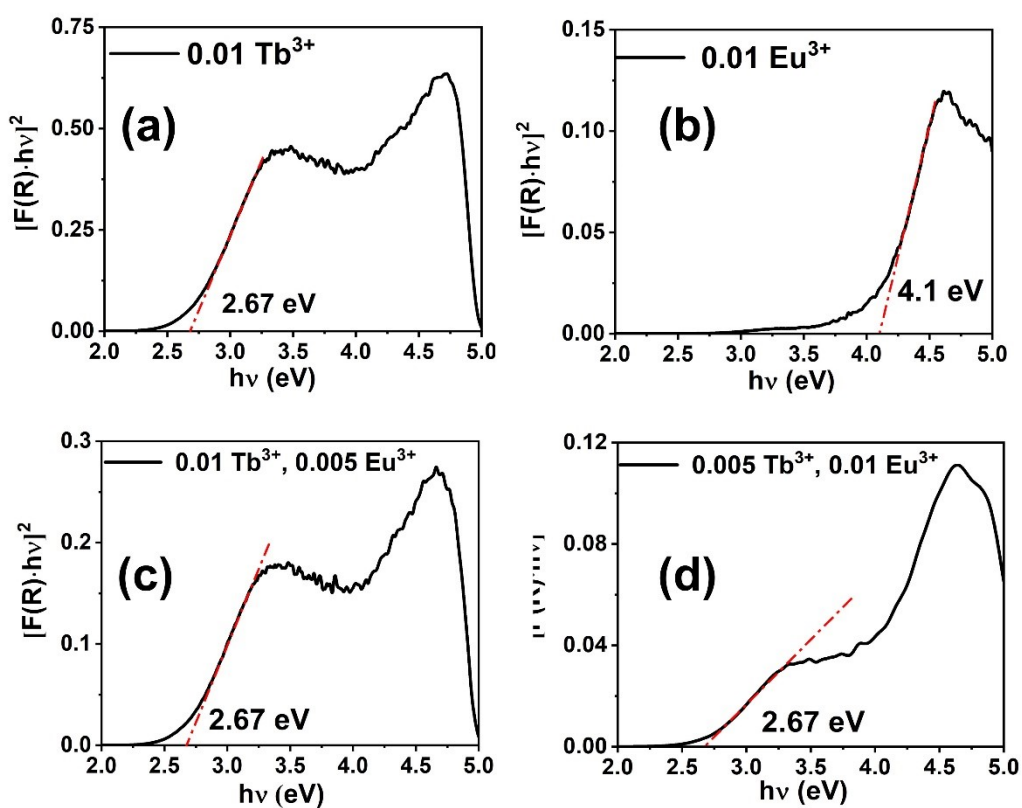

**Figure S6** Optical band gap obtained from the DRS for: (a) YOF: 0.01 Tb<sup>3+</sup>, (b) YOF: 0.01 Eu<sup>3+</sup>, (c) YOF: 0.01 Tb<sup>3+</sup>, 0.005 Eu<sup>3+</sup>, (d) YOF: 0.005 Tb<sup>3+</sup>, 0.01 Eu<sup>3+</sup> nanophosphors.



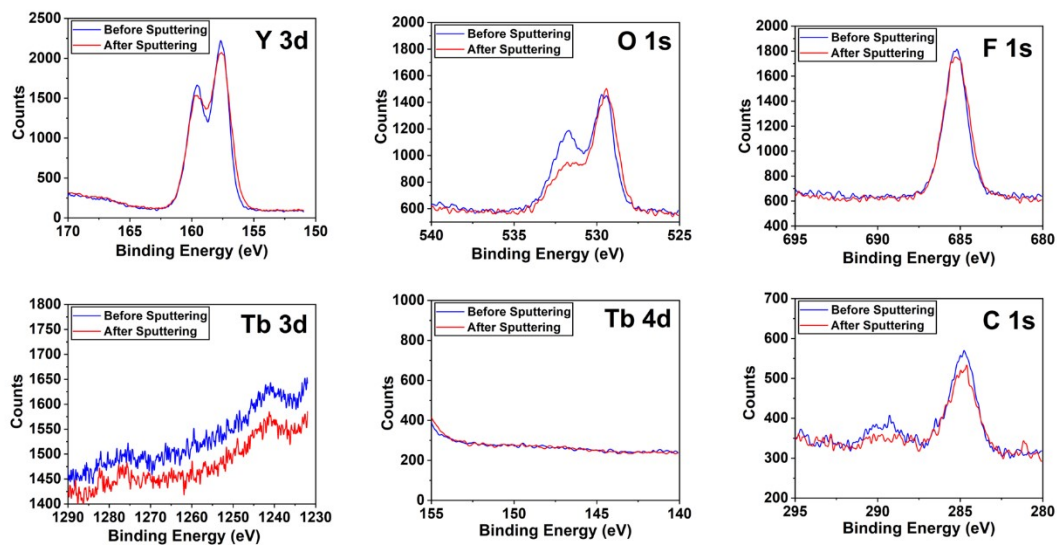

**Figure S7** High-resolution XPS spectra of different core levels of YOF: 0.01 Tb<sup>3+</sup> nanophosphors before and after sputtering.

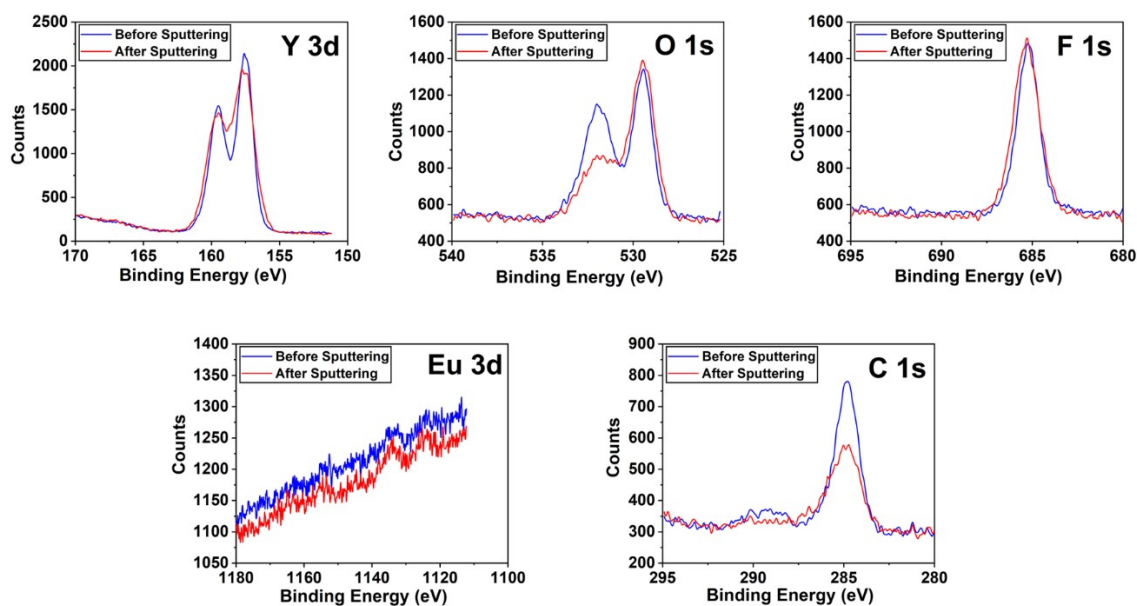

**Figure S8** High-resolution XPS spectra of different core levels of YOF: 0.01 Eu<sup>3+</sup> nanophosphors before and after sputtering.

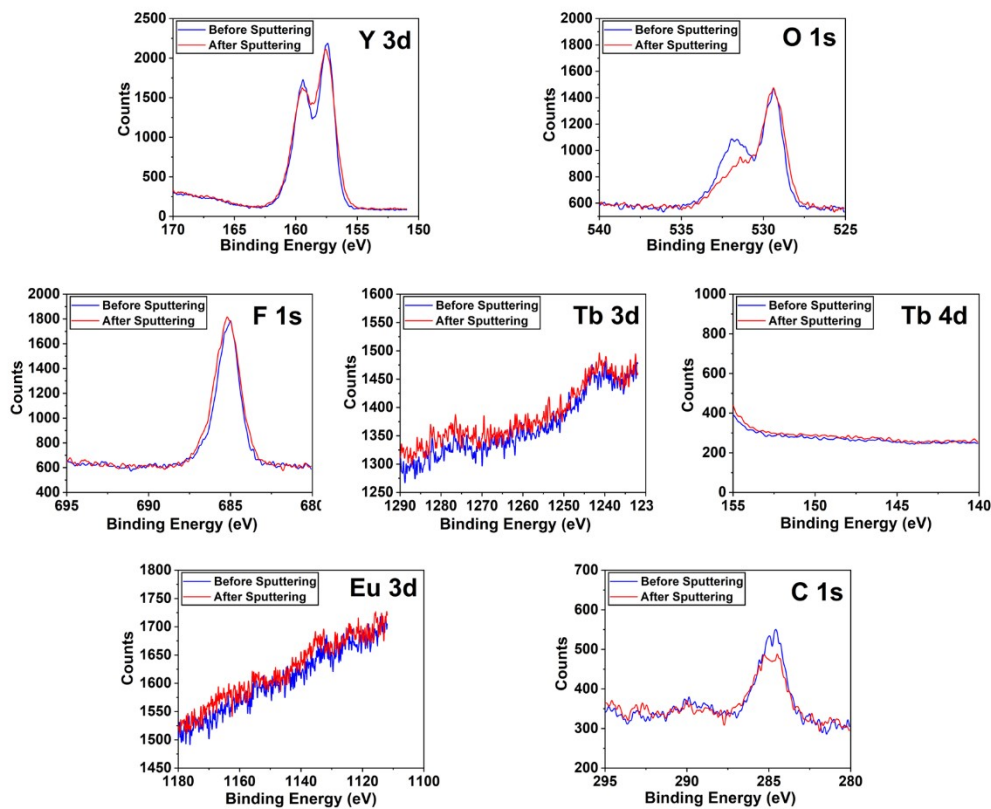

**Figure S9** High-resolution XPS spectra of different core levels of YOF: 0.01 Tb<sup>3+</sup>, 0.005 Eu<sup>3+</sup> nanophosphors before and after sputtering.



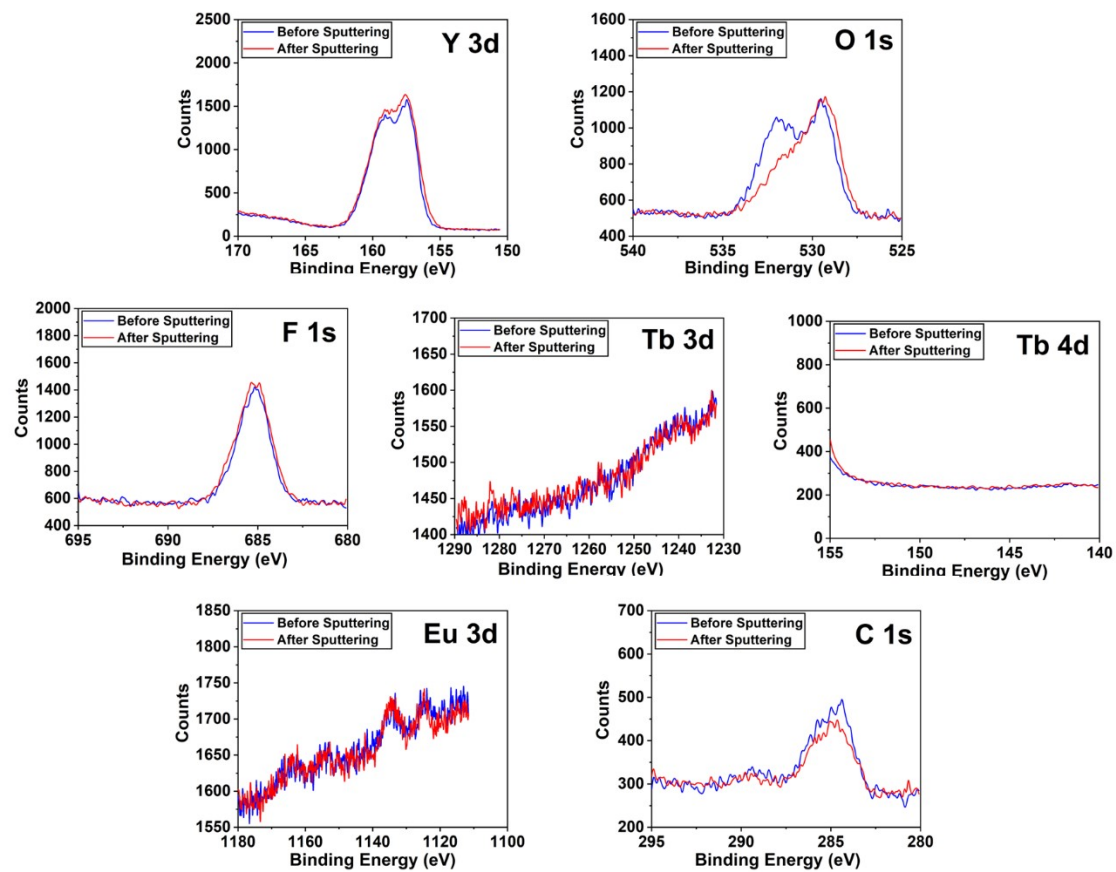

**Figure S10** High-resolution XPS spectra of different core levels of YOF: 0.005 Tb<sup>3+</sup>, 0.01 Eu<sup>3+</sup> nanophosphors before and after sputtering.

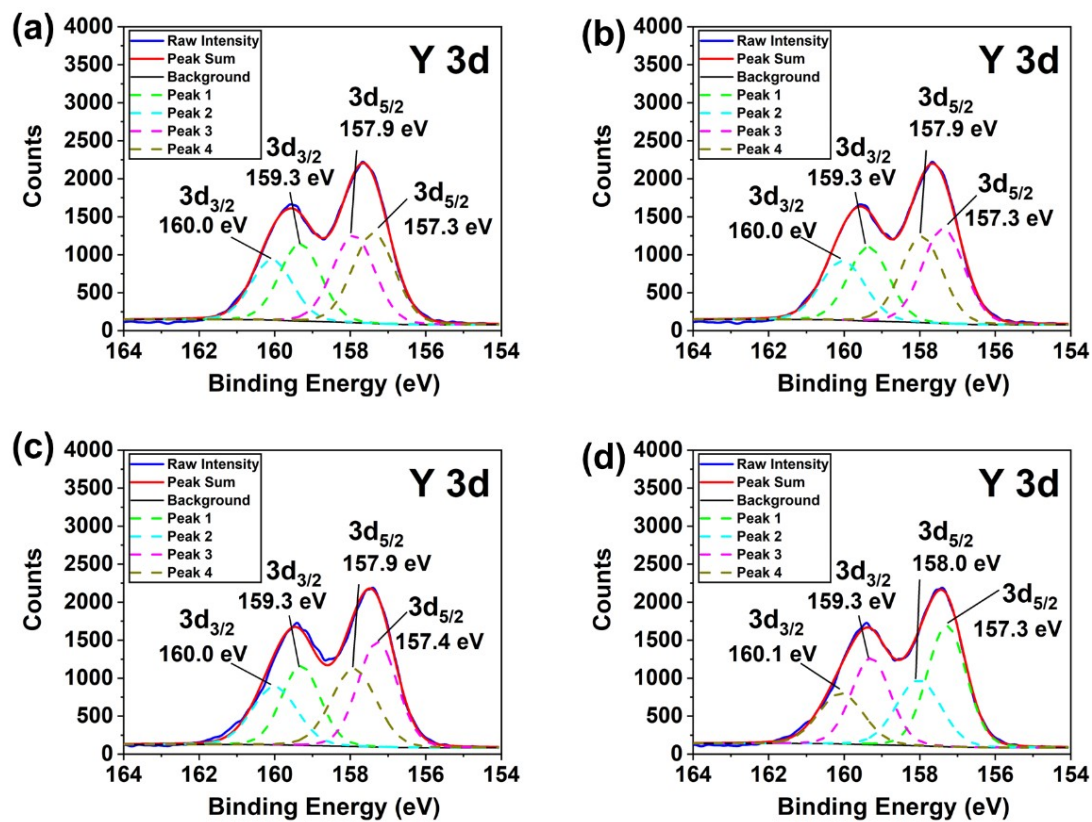

**Figure S11** High-resolution XPS curve fitting for the Y 3d signals obtained for: (a) YOF: 0.01  $Tb^{3+}$ , (b) YOF: 0.01  $Eu^{3+}$ , (c) YOF: 0.01  $Tb^{3+}$ , 0.005  $Eu^{3+}$ , and (d) YOF: 0.005  $Tb^{3+}$ , 0.01  $Eu^{3+}$  nanophosphors.

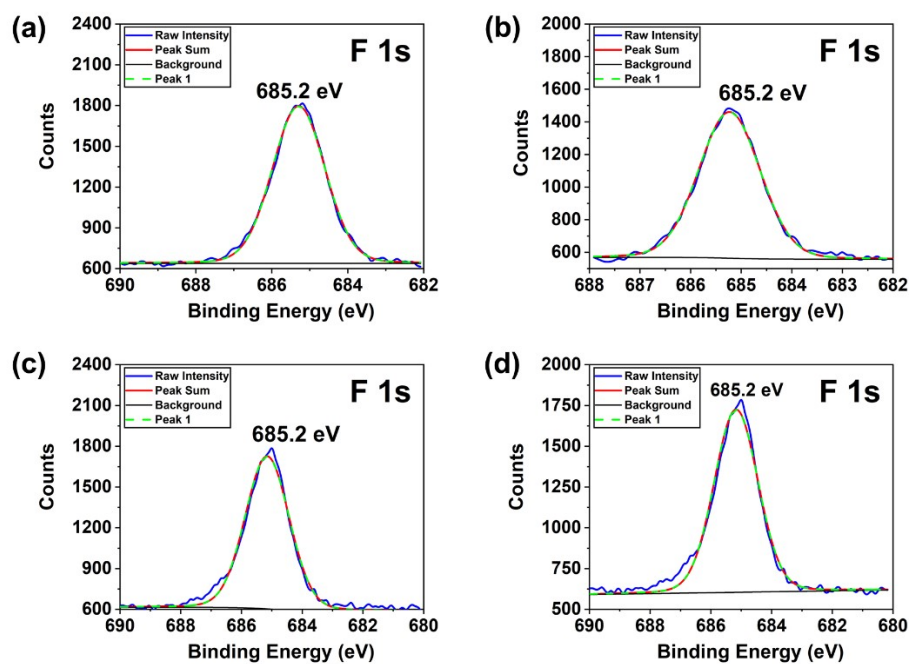

**Figure S12** High-resolution XPS curve fitting for the F 1s signals obtained for: (a) YOF: 0.01 Tb<sup>3+</sup>, (b) YOF: 0.01 Eu<sup>3+</sup>, (c) YOF: 0.01 Tb<sup>3+</sup>, 0.005 Eu<sup>3+</sup>, and (d) YOF: 0.005 Tb<sup>3+</sup>, 0.01 Eu<sup>3+</sup> nanophosphors.

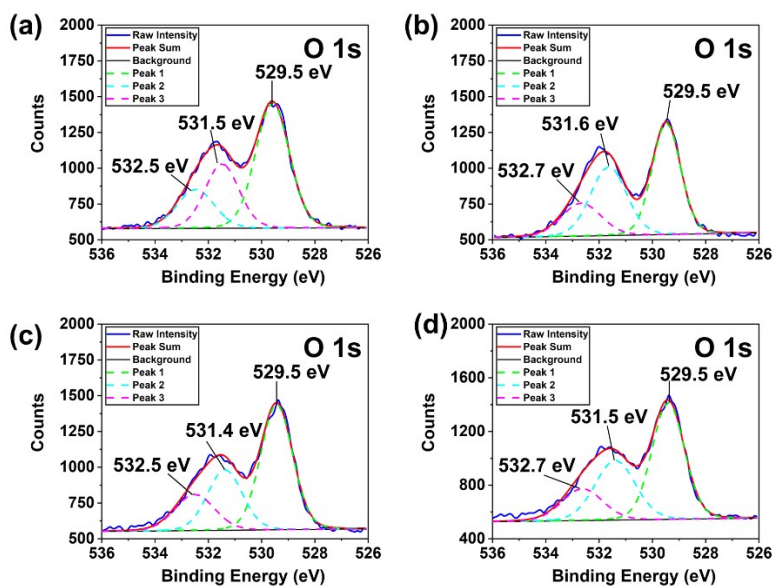

**Figure S13** High-resolution XPS curve fitting for the O 1s signals obtained for: (a) YOF: 0.01 Tb<sup>3+</sup>, (b) YOF: 0.01 Eu<sup>3+</sup>, (c) YOF: 0.01 Tb<sup>3+</sup>, 0.005 Eu<sup>3+</sup>, and (d) YOF: 0.005 Tb<sup>3+</sup>, 0.01 Eu<sup>3+</sup> nanophosphors.

**Table S1** CIE chromaticity coordinates of YOF: 0.01 Tb<sup>3+</sup>, *x* Eu<sup>3+</sup> ( $0 \leq x \leq 0.02$ )  
nanophosphors excited at 241 nm.

| <b>Eu<sup>3+</sup></b> | <b>x</b> | <b>y</b> |
|------------------------|----------|----------|
| 0                      | 0.2819   | 0.5395   |
| 0.001                  | 0.2956   | 0.5349   |
| 0.002                  | 0.3068   | 0.5281   |
| 0.005                  | 0.3494   | 0.5104   |
| 0.01                   | 0.4084   | 0.4866   |
| 0.02                   | 0.4931   | 0.4438   |

**Table S2** CIE chromaticity coordinates of YOF: *y* Tb<sup>3+</sup>, 0.01 Eu<sup>3+</sup> ( $0 \leq y \leq 0.02$ )  
nanophosphors excited at 241 nm.

| <b>Tb<sup>3+</sup></b> | <b>x</b> | <b>y</b> |
|------------------------|----------|----------|
| 0                      | 0.6401   | 0.3465   |
| 0.001                  | 0.5088   | 0.3482   |
| 0.002                  | 0.4951   | 0.3552   |
| 0.005                  | 0.4318   | 0.4215   |
| 0.01                   | 0.4119   | 0.4855   |
| 0.02                   | 0.4028   | 0.5286   |

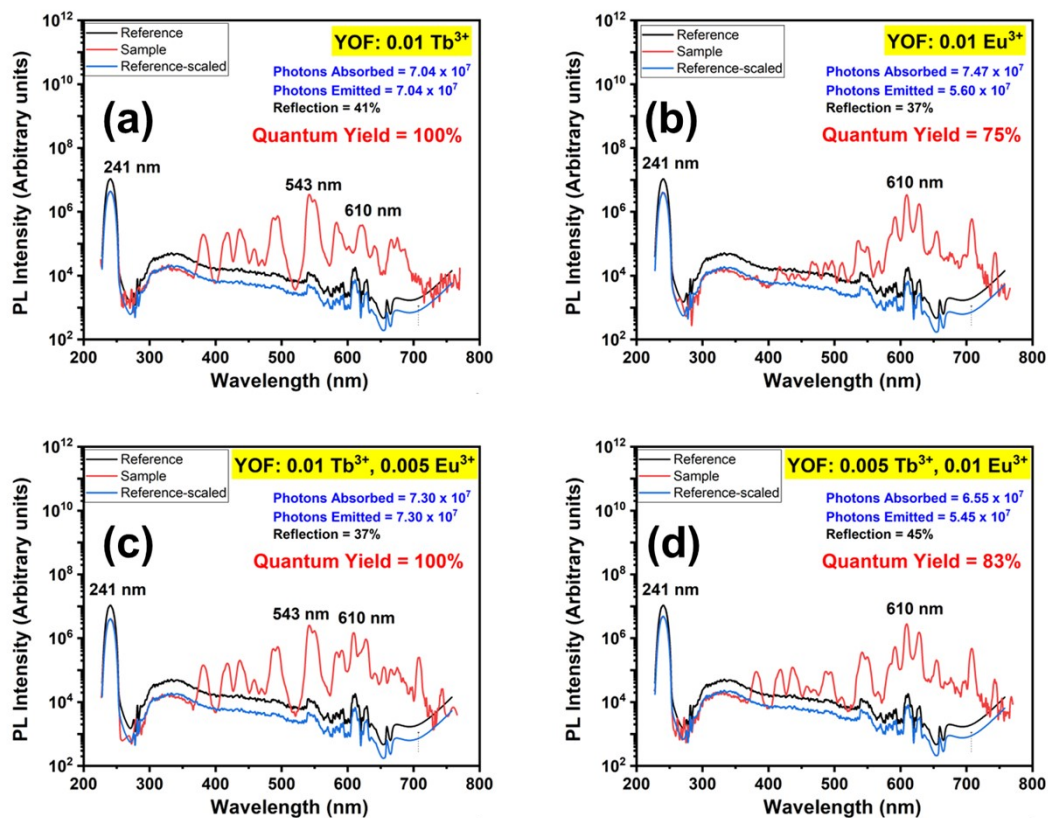

**Figure S14** PLQY evaluation of: **(a)** YOF: 0.01 Tb<sup>3+</sup>, **(b)** YOF: 0.01 Eu<sup>3+</sup>, **(c)** YOF: 0.01 Tb<sup>3+</sup>, 0.005 Eu<sup>3+</sup>, **(d)** YOF: 0.005 Tb<sup>3+</sup>, 0.01 Eu<sup>3+</sup> nanophosphors.

**Table S3** Fitting parameters obtained for the PL decay curves of YOF: 0.01 Tb<sup>3+</sup>,  $x$  Eu<sup>3+</sup> ( $0 \leq x \leq 0.02$ ) nanophosphors excited at 241 nm and monitored at 543 nm.

| Eu <sup>3+</sup> | Decay time $\tau$ (ms) |
|------------------|------------------------|
| $x = 0$          | $2.05 \pm 0.003$       |
| $x = 0.001$      | $1.97 \pm 0.003$       |
| $x = 0.002$      | $1.92 \pm 0.003$       |
| $x = 0.005$      | $1.88 \pm 0.003$       |
| $x = 0.01$       | $1.77 \pm 0.003$       |
| $x = 0.02$       | $1.65 \pm 0.003$       |

**Table S4** Fitting parameters obtained for the PL decay curves of YOF: 0.01 Tb<sup>3+</sup>, x Eu<sup>3+</sup> (0 ≤ x ≤ 0.02) nanophosphors excited at 241 nm and monitored at 610 nm.

| Eu <sup>3+</sup> | Decay time $\tau$ (ms) |
|------------------|------------------------|
| x = 0.001        | 1.42 ± 0.003           |
| x = 0.002        | 1.50 ± 0.003           |
| x = 0.005        | 1.54 ± 0.003           |
| x = 0.01         | 1.59 ± 0.003           |
| x = 0.02         | 1.61 ± 0.003           |

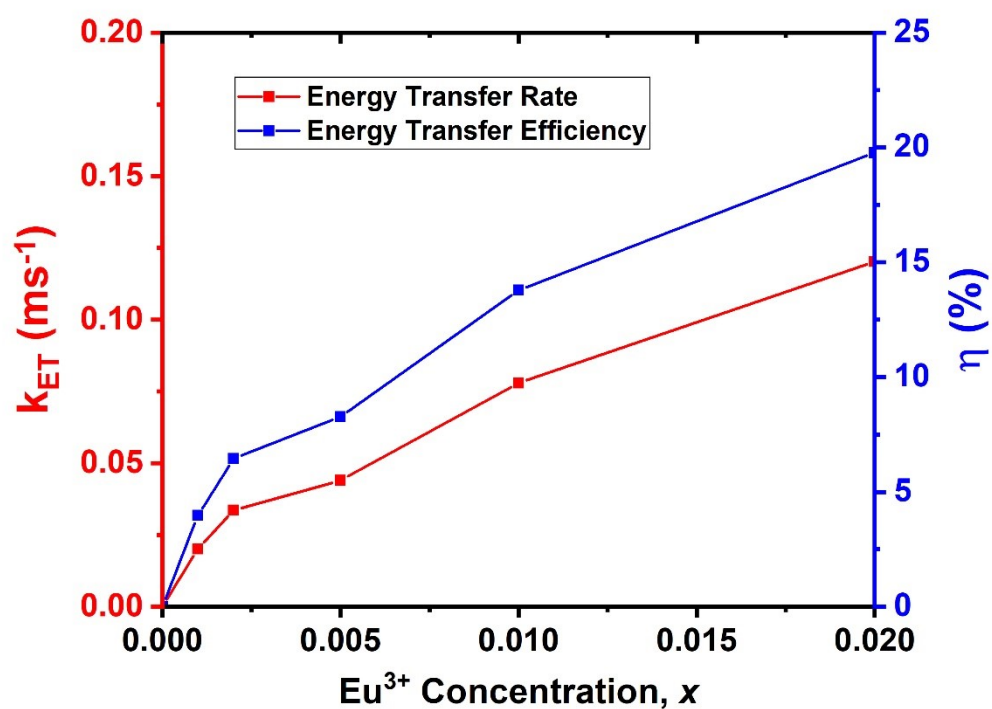

**Figure S15** Variation of energy transfer rate and efficiency of YOF: 0.01 Tb<sup>3+</sup>, x Eu<sup>3+</sup> (0 ≤ x ≤ 0.02) nanophosphors.



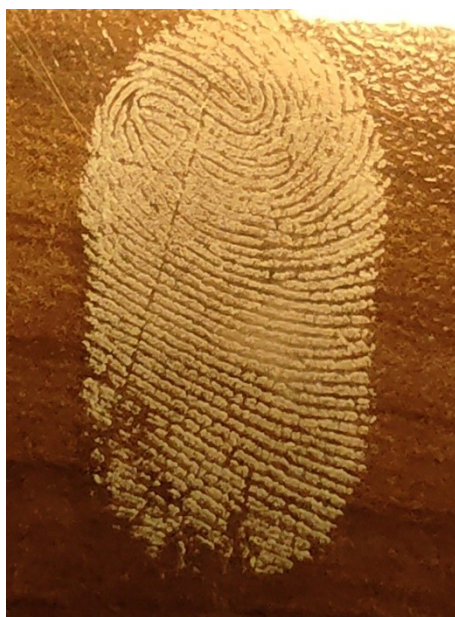

**Figure S16** Bright-field image of LFP dusted with YOF: 0.01 Tb<sup>3+</sup>, 0.001 Eu<sup>3+</sup> nanophosphors captured under a fluorescent lamp.
